# Supplementary material
Source: publisher figshare collection journal article supplement (https://future-science-group.figshare.com/articles/dataset/_/23967339)
Supplement: Supplementary file 1 [file 1]

**Supplementary Table 1.** HPLC Gradient Profile

| **Time (min)** | **Flow Rate (ml/min)** | **% A** | **% B** |
| --- | --- | --- | --- |
| Initial | 0.8 | 75 | 25 |
| 1.00 | 0.8 | 75 | 25 |
| 1.01 | 0.8 | 5 | 95 |
| 1.99 | 0.8 | 5 | 95 |
| 2.00 | 0.8 | 75 | 25 |
| 2.20 | 0.8 | 5 | 95 |
| 2.40 | 0.8 | 5 | 95 |
| 2.50 | 0.8 | 75 | 25 |
| 4.00 | Controller Stop | | |

Mobile Phase A: Formic acid (0.5%) in ammonium formate (2.4 mM) in water.

Mobile Phase B: Formic acid (0.5%) in ammonium formate (2.4 mM) in acetonitrile:water (90:10v/v).

The autosampler temperature was at 6°C.

ColumnWaters Acquity UPLC HSS T3 2.1x50mm 1.8µM column at 40°C.

Injection volume: 10 uL.
